# Supplementary material for: Validation of the Health Index in the Postoperative Period: Use of the Nursing Outcome Classification to Determine the Health Level
Source: MDPI journal article supplement (doi:10.3390/healthcare12080862), 2024-04-20
Supplement: s1 [file s1]

**Supplementary Table S1.** Health Variables Definition [29]

| <b>Health Variables Definition</b> |                                                                                                                                                                                                                                     |
|------------------------------------|-------------------------------------------------------------------------------------------------------------------------------------------------------------------------------------------------------------------------------------|
| Physical Functioning (Pf):         | Functioning of the apparatuses and corporative systems of the person: locomotor, digestive, respiratory, urinary, genital, endocrine and circulatory systems and bone, muscular and nervous systems. It has a reversible character. |
| Mental Functioning (Mf):           | In order to determine the mental functioning, the state of consciousness, space-time orientation, behavior and language will be valued. It is reversible.                                                                           |
| Social Functioning (Sf):           | To determine the social functioning of a person will be assessed the ability to communicate and interact with other people. It is reversible.                                                                                       |
| Comfort Status (Cs):               | The welfare of the person, their tranquility, personal security, adaptation to the environment will be valued.                                                                                                                      |
| Material Resources (Mr):           | Set of material goods needed to live.                                                                                                                                                                                               |
| Time Resource (Tr):                | Temporary availability to carry out your care.                                                                                                                                                                                      |
| Sings Presence (Sg):               | Sign measurable and valuable by the healthcare professional (heart rate, blood pressure ...)                                                                                                                                        |
| Symptoms Presence (Sn):            | Manifestations of each person (pain, nausea ...)                                                                                                                                                                                    |
| Physical Condition (Pc):           | Sequel of irreversible character in the functioning of the body.                                                                                                                                                                    |
| Mental Condition (Mc):             | Sequel of irreversible character in mental functioning.                                                                                                                                                                             |
| Social Condition (Sc):             | Sequel of irreversible character in social functioning.                                                                                                                                                                             |

**Supplementary Table S2.** Validation of the correlation between Health Variables and NOC labels

| Health Variables            | NOC selected in Construction of a preliminary instrument phase | Internal Validation Round 1 | Internal Validation Round 2 |
|-----------------------------|----------------------------------------------------------------|-----------------------------|-----------------------------|
|                             |                                                                | Interpretation              | Final decision              |
| <b>Physical Functioning</b> | Ambulate                                                       | Not approved                | Not approved                |
|                             | Self-care: Activities of daily living                          | Not approved                |                             |
|                             | Self-care: Instrumental activities of daily living             | Not approved                |                             |
|                             | Personal welfare                                               | Revised                     |                             |
|                             | Health promoting behavior                                      | Not approved                | Not approved                |
|                             | Bowel continence                                               | Not approved                |                             |
|                             | Urinary continence                                             | Not approved                |                             |
|                             | Physical aging                                                 | Not approved                |                             |
|                             | Comfort status                                                 | Revised                     | Not approved                |
|                             | Physical comfort state                                         | Not approved                |                             |
|                             | Personal health status                                         | Approved                    | Approved                    |
|                             | Physical comfort state                                         | Not approved                |                             |
|                             | Skeletal function                                              | Not approved                |                             |
|                             | Gastrointestinal function                                      | Not approved                |                             |
|                             | Renal function                                                 | Not approved                |                             |
|                             | Auditory sensory function                                      | Not approved                |                             |
|                             | Skin sensory function                                          | Not approved                |                             |
|                             | Sensory function taste and smell                               | Not approved                |                             |
|                             | Sensory proprioceptive function                                | Not approved                |                             |
|                             | Sensory function vision                                        | Not approved                |                             |
|                             | Sensory function                                               | Not approved                |                             |
|                             | Mobility                                                       | Not approved                |                             |

|                           |                                                    |              |              |
|---------------------------|----------------------------------------------------|--------------|--------------|
|                           | Discomfort level                                   | Not approved |              |
|                           | Health orientation                                 | Revised      | Not approved |
| <b>Mental Functioning</b> | Self-care: Activities of daily living              | Not approved |              |
|                           | Self-care: Instrumental activities of daily living | Not approved |              |
|                           | Self esteem                                        | Not approved |              |
|                           | Cognition                                          | Not approved |              |
|                           | Comfort status                                     | Revised      | Not approved |
|                           | Psychospiritual comfort state                      | Not approved |              |
|                           | Personal health status                             | Approved     | Approved     |
|                           | Neurological status                                | Not approved |              |
|                           | Discomfort level                                   | Not approved |              |
|                           | Health orientation                                 | Revised      | Not approved |
|                           | Health promoting behavior                          | Not approved |              |
| <b>Social Functioning</b> | Acceptance: State of Health                        | Not approved |              |
|                           | Quality of life                                    | Revised      | Not approved |
|                           | Health promoting behavior                          | Not approved |              |
|                           | Comfort status                                     | Revised      | Not approved |
|                           | Sociocultural comfort state                        | Not approved |              |
|                           | Personal health status                             | Approved     | Approved     |
|                           | Health orientation                                 | Revised      | Not approved |
|                           | Severity of loneliness                             | Not approved |              |
|                           | Social support                                     | Not approved |              |
| <b>Comfort Status</b>     | Acceptance: State of Health                        | Not approved |              |
|                           | Adaptation to physical disability                  | Revised      | Not approved |
|                           | Self esteem                                        | Not approved |              |
|                           | Personal welfare                                   | Revised      | Not approved |
|                           | Quality of life                                    | Revised      | Not approved |
|                           | Health promoting behavior                          | Not approved |              |
|                           | Comfort status                                     | Approved     | Approved     |
|                           | Health orientation                                 | Revised      | Not approved |
| <b>Material Resources</b> | Self-care: Instrumental activities of daily living | Not approved |              |
|                           | Personal welfare                                   | Not approved |              |
|                           | Quality of life                                    | Revised      | Not approved |
|                           | Health promoting behavior                          | Not approved |              |
|                           | Health beliefs: resource perception                | Approved     | Approved     |
|                           | Health orientation                                 | Revised      | Not approved |
| <b>Time Resource</b>      | Self-care: Instrumental activities of daily living | Revised      | Not approved |
|                           | Personal welfare                                   | Not approved |              |
|                           | Quality of life                                    | Revised      | Not approved |
|                           | Health promoting behavior                          | Not approved |              |
|                           | Health beliefs: resource perception                | Approved     | Approved     |
|                           | Health orientation                                 | Revised      | Not approved |
| <b>Sings Presence</b>     | Knowledge: disease process                         | Approved     | Approved     |
|                           | Patient / user satisfaction: Symptom control       | Not approved |              |
|                           | Symptom severity                                   | Revised      | Not approved |
|                           | Knowledge: disease process                         | Approved     | Approved     |

|                           |                                              |              |              |
|---------------------------|----------------------------------------------|--------------|--------------|
| <b>Symptoms Presence</b>  | Symptom control                              | Revised      | Not approved |
|                           | Patient / user satisfaction: Symptom control | Not approved |              |
|                           | Symptom severity                             | Revised      | Not approved |
| <b>Physical Condition</b> | Adaptation to physical disability            | Revised      | Not approved |
|                           | Ambulate                                     | Not approved |              |
|                           | Comfort status                               | Revised      | Not approved |
|                           | Personal health status                       | Approved     | Approved     |
|                           | Physical form                                | Not approved |              |
|                           | Skeletal function                            | Not approved |              |
|                           | Mobility                                     | Not approved |              |
| <b>Mental Condition</b>   | Self esteem                                  | Not approved |              |
|                           | Comfort status                               | Revised      | Not approved |
|                           | Personal health status                       | Approved     | Approved     |
|                           | Neurological status                          | Not approved |              |
|                           | Cognition                                    | Not approved |              |
| <b>Social Condition</b>   | Acceptance: State of Health                  | Not approved |              |
|                           | Quality of life                              | Revised      | Not approved |
|                           | Comfort status                               | Revised      | Not approved |
|                           | Personal health status                       | Approved     | Approved     |
|                           | Social support                               | Not approved |              |
